# Supplementary material for: A Research Agenda for Helminth Diseases of Humans: Health Research and Capacity Building in Disease-Endemic Countries for Helminthiases Control
Source: PLOS journal article supplement (doi:10.1371/journal.pntd.0001602), 2012-04-24
Supplement: S1 (10.1371/journal.pntd.0001602.s001) [file journal.pntd.0001602.s001]

**Figure S1.** Concept and Strategy of the Hashimoto Initiative for Global Parasite Control

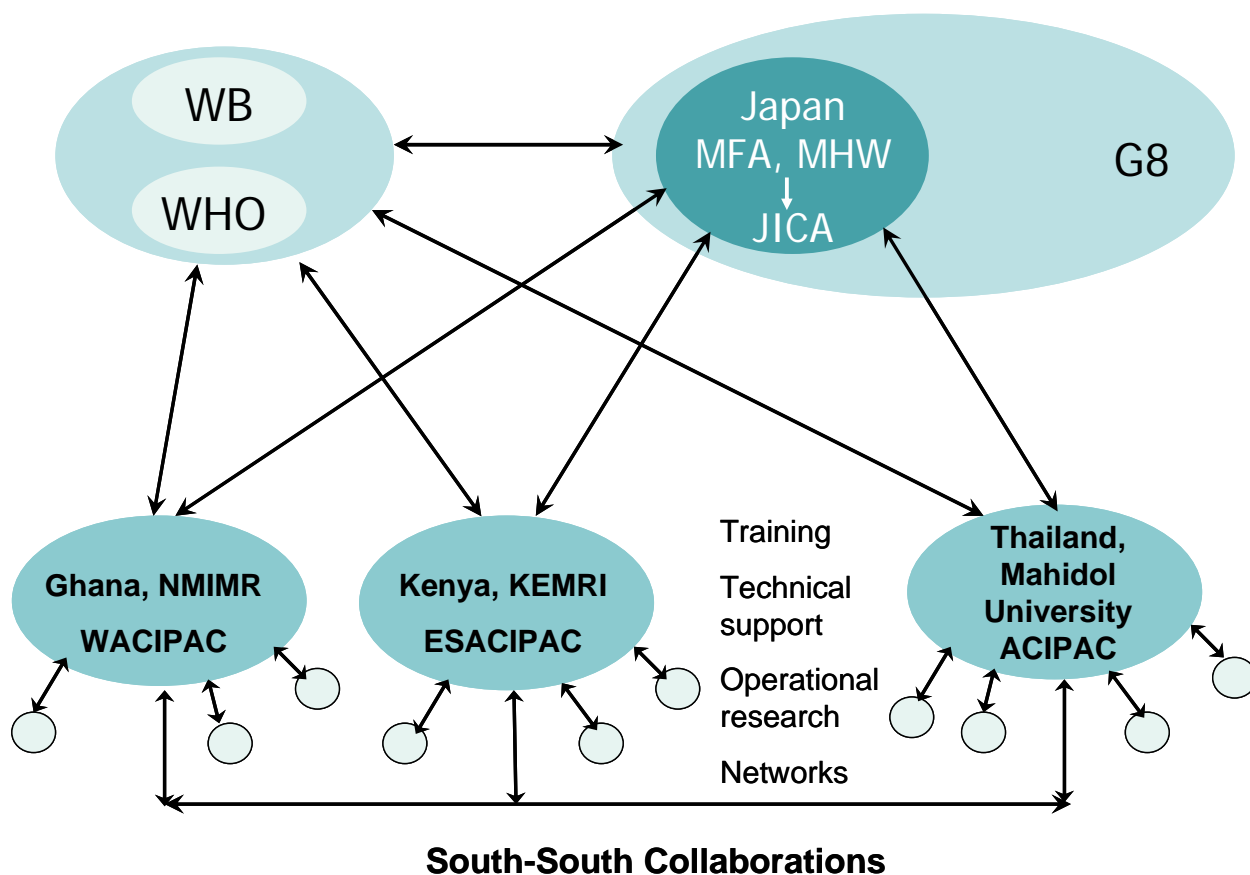

**WB**, World Bank; **WHO**, World Health Organization; **MFA**, Japan Ministry of Foreign Affairs; **MHW**, Japan Ministry of Health and Welfare; **JICA**, Japan International Cooperation Agency; **G8**, The Group of Eight (Canada, France, Germany, Italy, Japan, Russia, UK, USA); **NMIMR**, Noguchi Memorial Institute for Medical Research; **WACIPAC**, West Africa Centre for International Parasite Control; **KEMRI**, Kenya Medical Research Institute; **ESACIPAC**, Eastern and Southern Africa Centre of International Parasite Control; **ACIPAC**, Asian Centre of International Parasite Control (adapted from Ref [1] of Text S1).
